# Supplementary material for: Genome-Wide Investigation of the NF-X1 Gene Family in Populus trichocarpa Expression Profiles during Development and Stress
Source: MDPI journal article supplement (doi:10.3390/ijms22094664), 2021-04-28
Supplement: s1 [file s1]

**Table S1. Primer sequences used RT-PCR**

| Gene Name         | Forward primers      | Reverse primers           |
|-------------------|----------------------|---------------------------|
| <i>PtrNF-X1-1</i> | TTGTTGCTATGCCATCCCGT | GGCAACCTCTAACACTCCCC      |
| <i>PtrNF-X1-2</i> | ATGGCTGCTCGTTCATGTGG | ACCTTCTCCTCCAGGTCTTTGG    |
| <i>PtrNF-X1-3</i> | GTAGCAGGTCCAGATTCCCG | CTCGAAGGTGGGTTTGGGTT      |
| <i>PtrNF-X1-4</i> | GCGCACCTTGTTTGGTTTCT | GGAAGTTCTCCTTAAGTTCTTCCCA |

**Table S2. Accession numbers of gene**

| Order | Species                           | abb. | Nr | Accession numbers                       | Name       |
|-------|-----------------------------------|------|----|-----------------------------------------|------------|
| 1     | <i>Amaranthus hypochondriacus</i> | Ah   | 3  | AHYPO_010689-RA                         | AhNF-X1-1  |
|       |                                   |      |    | AHYPO_013985-RA                         | AhNF-X1-2  |
|       |                                   |      |    | AHYPO_014930-RA                         | AhNF-X1-3  |
| 2     | <i>Amborella trichopoda</i>       | Atr  | 1  | evm_27.model.AmTr_v1.0_scaffold00060.63 | AtrNF-X1-1 |
| 3     | <i>Ananas comosus</i>             | Ac   | 2  | Aco002964.1                             | AcNF-X1-1  |
|       |                                   |      |    | Aco021291.1                             | AcNF-X1-2  |
| 4     | <i>Aquilegia coerulea</i>         | Aco  | 3  | Aqcoe1G302400.1                         | AcoNF-X1-1 |
|       |                                   |      |    | Aqcoe1G420000.1                         | AcoNF-X1-2 |
|       |                                   |      |    | Aqcoe3G241800.1                         | AcoNF-X1-3 |
| 5     | <i>Arabidopsis thaliana</i>       | At   | 2  | AT1G10170.1                             | AtNF-X1-1  |
|       |                                   |      |    | AT5G05660.1                             | AtNF-X1-2  |
| 6     | <i>Boechera stricta</i>           | Bs   | 3  | Bostr.13129s0405.1                      | BsNF-X1-1  |
|       |                                   |      |    | Bostr.13671s0471.1                      | BsNF-X1-2  |
|       |                                   |      |    | Bostr.15697s0430.1                      | BsNF-X1-3  |
| 7     | <i>Brachypodium distachyon</i>    | Bd   | 2  | Bradi1g44270.2                          | BdNF-X1-1  |
|       |                                   |      |    | Bradi2g00226.1                          | BdNF-X1-2  |
| 8     | <i>Brachypodium stacei</i>        | Bst  | 2  | Brast01G414700.1                        | BstNF-X1-1 |
|       |                                   |      |    | Brast07G091900.1                        | BstNF-X1-2 |
| 9     | <i>Capsella rubella</i>           | Cr   | 2  | Carubv10003051m                         | CrNF-X1-1  |
|       |                                   |      |    | Carubv10008145m                         | CrNF-X1-2  |
| 10    | <i>Carica papaya</i>              | Cp   | 1  | evm.model.supercontig_19.173            | CpNF-X1-1  |
| 11    | <i>Chlamydomonas reinhardtii</i>  | Cre  | 1  | Cre03.g163200.t1.1                      | CreNF-X1-1 |

|    |                                       |     |   |                                |            |
|----|---------------------------------------|-----|---|--------------------------------|------------|
| 12 | <i>Citrus clementina</i>              | Cc  | 2 | <i>Ciclev10018607m</i>         | CcNF-X1-1  |
|    |                                       |     |   | <i>Ciclev10030684m</i>         | CcNF-X1-2  |
| 13 | <i>Citrus sinensis</i>                | Cs  | 6 | <i>orange1.1g001376m</i>       | CsNF-X1-1  |
|    |                                       |     |   | <i>orange1.1g007271m</i>       | CsNF-X1-2  |
|    |                                       |     |   | <i>orange1.1g009037m</i>       | CsNF-X1-3  |
|    |                                       |     |   | <i>orange1.1g011784m</i>       | CsNF-X1-4  |
|    |                                       |     |   | <i>orange1.1g011809m</i>       | CsNF-X1-5  |
|    |                                       |     |   | <i>orange1.1g011815m</i>       | CsNF-X1-6  |
| 14 | <i>Coccomyxa subellipsoidea</i> C-169 | Cos | 1 | 65191                          | CosNF-X1-1 |
| 15 | <i>Daucus carota</i>                  | Dc  | 2 | <i>DCAR_003534</i>             | DcNF-X1-1  |
|    |                                       |     |   | <i>DCAR_024827</i>             | DcNF-X1-2  |
| 16 | <i>Eucalyptus grandis</i>             | Eg  | 3 | <i>Eucgr.H00552.1</i>          | EgNF-X1-1  |
|    |                                       |     |   | <i>Eucgr.J00206.1</i>          | EgNF-X1-2  |
|    |                                       |     |   | <i>Eucgr.K02284.1</i>          | EgNF-X1-3  |
| 17 | <i>Eutrema salsugineum</i>            | Es  | 3 | <i>Thhalv10006632m</i>         | EsNF-X1-1  |
|    |                                       |     |   | <i>Thhalv10006708m</i>         | EsNF-X1-2  |
|    |                                       |     |   | <i>Thhalv10012642m</i>         | EsNF-X1-3  |
| 18 | <i>Fragaria vesca</i>                 | Fv  | 2 | <i>mrna09346.1-v1.0-hybrid</i> | FvNF-X1-1  |
|    |                                       |     |   | <i>mrna20971.1-v1.0-hybrid</i> | FvNF-X1-2  |
| 19 | <i>Glycine max</i>                    | Gm  | 9 | <i>Glyma.07G104700.1</i>       | GmNF-X1-1  |
|    |                                       |     |   | <i>Glyma.07G104700.2</i>       | GmNF-X1-2  |
|    |                                       |     |   | <i>Glyma.08G055900.1</i>       | GmNF-X1-3  |
|    |                                       |     |   | <i>Glyma.09G173000.1</i>       | GmNF-X1-4  |
|    |                                       |     |   | <i>Glyma.11G230200.1</i>       | GmNF-X1-5  |
|    |                                       |     |   | <i>Glyma.18G027000.1</i>       | GmNF-X1-6  |
|    |                                       |     |   | <i>Glyma.18G027000.2</i>       | GmNF-X1-7  |
|    |                                       |     |   | <i>Glyma.18G027000.3</i>       | GmNF-X1-8  |
|    |                                       |     |   | <i>Glyma.18G027000.4</i>       | GmNF-X1-9  |
| 20 | <i>Gossypium raimondii</i>            | Gr  | 3 | <i>Gorai.006G058600.1</i>      | GrNF-X1-1  |
|    |                                       |     |   | <i>Gorai.010G197800.1</i>      | GrNF-X1-2  |
|    |                                       |     |   | <i>Gorai.010G197800.2</i>      | GrNF-X1-3  |
| 21 | <i>Linum usitatissimum</i>            | Lu  | 4 | <i>Lus10025071</i>             | LuNF-X1-1  |
|    |                                       |     |   | <i>Lus10028286</i>             | LuNF-X1-2  |
|    |                                       |     |   | <i>Lus10034470</i>             | LuNF-X1-3  |
|    |                                       |     |   | <i>Lus10040200</i>             | LuNF-X1-4  |
| 22 | <i>Malus domestica</i>                | Md  | 3 | <i>MDP0000239523</i>           | MdNF-X1-1  |
|    |                                       |     |   | <i>MDP0000280911</i>           | MdNF-X1-2  |
|    |                                       |     |   | <i>MDP0000603846</i>           | MdNF-X1-3  |
| 23 | <i>Manihot esculenta</i>              | Me  | 3 | <i>Manes.06G003200.1</i>       | MeNF-X1-1  |
|    |                                       |     |   | <i>Manes.06G003200.2</i>       | MeNF-X1-2  |
|    |                                       |     |   | <i>Manes.10G012200.1</i>       | MeNF-X1-3  |

|    |                                     |     |   |                           |            |
|----|-------------------------------------|-----|---|---------------------------|------------|
| 24 | <i>Marchantia polymorpha</i>        | Mp  | 4 | Mapoly0036s0109.1         | MpNF-X1-1  |
|    |                                     |     |   | Mapoly0036s0109.2         | MpNF-X1-2  |
|    |                                     |     |   | Mapoly0036s0109.3         | MpNF-X1-3  |
|    |                                     |     |   | Mapoly0154s0047.1         | MpNF-X1-4  |
| 25 | <i>Medicago truncatula</i>          | Mt  | 4 | Medtr3g070780.1           | MtNF-X1-1  |
|    |                                     |     |   | Medtr3g070780.2           | MtNF-X1-2  |
|    |                                     |     |   | Medtr4g027040.1           | MtNF-X1-3  |
|    |                                     |     |   | Medtr6g071140.1           | MtNF-X1-4  |
| 26 | <i>Mimulus guttatus</i>             | Mg  | 2 | Migut.D01221.1            | MgNF-X1-1  |
|    |                                     |     |   | Migut.F00683.1            | MgNF-X1-2  |
| 27 | <i>Musa acuminata</i>               | Ma  | 2 | GSMUA_Achr2T18970_001     | MaNF-X1-1  |
|    |                                     |     |   | GSMUA_Achr7T12440_001     | MaNF-X1-2  |
| 28 | <i>Oropetium thomaeum</i>           | Ot  | 1 | Oropetium_20150105_07174A | OtNF-X1-1  |
| 29 | <i>Oryza sativa subsp. japonica</i> | Os  | 2 | LOC_Os01g06550.1          | OsNF-X1-1  |
|    |                                     |     |   | LOC_Os06g14190.1          | OsNF-X1-2  |
| 30 | <i>Panicum hallii</i>               | Ph  | 2 | Pahal.E04060.1            | PhNF-X1-1  |
|    |                                     |     |   | Pahal.E04060.2            | PhNF-X1-2  |
| 31 | <i>Panicum virgatum</i>             | Pv  | 3 | Pavir.4KG191400.1         | PvNF-X1-1  |
|    |                                     |     |   | Pavir.5KG080800.1         | PvNF-X1-2  |
|    |                                     |     |   | Pavir.5NG084900.1         | PvNF-X1-3  |
| 32 | <i>Phaseolus vulgaris</i>           | Pvu | 2 | Phvul.001G243400.1        | PvuNF-X1-1 |
|    |                                     |     |   | Phvul.002G331600.1        | PvuNF-X1-2 |
| 33 | <i>Physcomitrella patens</i>        | Pp  | 1 | Pp3c2_24250V3.1           | PpNF-X1-1  |
| 34 | <i>Populus euphratica</i>           | Pe  | 3 | CCG002829.1               | PeNF-X1-1  |
|    |                                     |     |   | CCG014737.1               | PeNF-X1-2  |
|    |                                     |     |   | CCG020445.2               | PeNF-X1-3  |
| 35 | <i>Populus trichocarpa</i>          | Ptr | 4 | Potri.008G068500.1        | PtrNF-X1-1 |
|    |                                     |     |   | Potri.010G188700.1        | PtrNF-X1-2 |
|    |                                     |     |   | Potri.012G043700.1        | PtrNF-X1-3 |
|    |                                     |     |   | Potri.015G034500.1        | PtrNF-X1-4 |
| 36 | <i>Prunus persica</i>               | Ppe | 2 | Prupe.2G250200.1          | PpeNF-X1-1 |
|    |                                     |     |   | Prupe.5G236400.1          | PpeNF-X1-2 |
| 37 | <i>Salix purpurea</i>               | Sp  | 5 | SapurV1A.0061s0270.1      | SpNF-X1-1  |
|    |                                     |     |   | SapurV1A.0061s0270.3      | SpNF-X1-2  |
|    |                                     |     |   | SapurV1A.0082s0290.1      | SpNF-X1-3  |
|    |                                     |     |   | SapurV1A.0665s0040.1      | SpNF-X1-4  |
|    |                                     |     |   | SapurV1A.0665s0040.2      | SpNF-X1-5  |
| 38 | <i>Setaria italica</i>              | Si  | 2 | Seita.4G110900.1          | SiNF-X1-1  |
|    |                                     |     |   | Seita.5G112600.1          | SiNF-X1-2  |
| 39 | <i>Setaria viridis</i>              | Sv  | 3 | Sevir.4G111000.1          | SvNF-X1-1  |
|    |                                     |     |   | Sevir.5G109300.1          | SvNF-X1-2  |

|    |                             |     |   |                           |            |
|----|-----------------------------|-----|---|---------------------------|------------|
|    |                             |     |   | Sevir.5G109300.2          | SvNF-X1-3  |
| 40 | <i>Sisymbrium irio</i>      | Sir | 2 | 676723276                 | SirNF-X1-1 |
|    |                             |     |   | 676738184                 | SirNF-X1-2 |
| 41 | <i>Solanum lycopersicum</i> | Sl  | 2 | Solyc03g118420.2.1        | SINF-X1-1  |
|    |                             |     |   | Solyc06g051570.2.1        | SINF-X1-2  |
| 42 | <i>Solanum tuberosum</i>    | St  | 2 | PGSC0003DMT400036773      | StNF-X1-1  |
|    |                             |     |   | PGSC0003DMT400036774      | StNF-X1-2  |
| 43 | <i>Sorghum bicolor</i>      | Sb  | 3 | Sobic.003G062300.1        | SbNF-X1-1  |
|    |                             |     |   | Sobic.004G354301.1        | SbNF-X1-2  |
|    |                             |     |   | Sobic.010G104100.1        | SbNF-X1-3  |
| 44 | <i>Sphagnum fallax</i>      | Sf  | 2 | Sphfalx0130s0063.1        | SfNF-X1-1  |
|    |                             |     |   | Sphfalx0218s0019.1        | SfNF-X1-2  |
| 45 | <i>Spirodela polyrhiza</i>  | Spo | 2 | Spipo23G0035500           | SpoNF-X1-1 |
|    |                             |     |   | Spipo2G0021300            | SpoNF-X1-2 |
| 46 | <i>Theobroma cacao</i>      | Tc  | 8 | Thecc1EG012484t1          | TcNF-X1-1  |
|    |                             |     |   | Thecc1EG017029t1          | TcNF-X1-2  |
|    |                             |     |   | Thecc1EG017029t2          | TcNF-X1-3  |
|    |                             |     |   | Thecc1EG017029t3          | TcNF-X1-4  |
|    |                             |     |   | Thecc1EG017029t4          | TcNF-X1-5  |
|    |                             |     |   | Thecc1EG042496t1          | TcNF-X1-6  |
|    |                             |     |   | Thecc1EG042496t2          | TcNF-X1-7  |
|    |                             |     |   | Thecc1EG042496t3          | TcNF-X1-8  |
| 47 | <i>Trifolium pratense</i>   | Tp  | 2 | Tp57577_TGAC_v2_mRNA11567 | TpNF-X1-1  |
|    |                             |     |   | Tp57577_TGAC_v2_mRNA23077 | TpNF-X1-2  |
| 48 | <i>Triticum aestivum</i>    | Ta  | 1 | Traes_3AS_496047B73.2     | TaNF-X1-1  |
| 49 | <i>Vitis vinifera</i>       | Vv  | 2 | GSVIVT01008482001         | VvNF-X1-1  |
|    |                             |     |   | GSVIVT01014100001         | VvNF-X1-2  |
| 50 | <i>Volvox carteri</i>       | Vc  | 1 | Vocar.0005s0190.1         | VcNF-X1-1  |
| 51 | <i>Zea mays</i>             | Zm  | 4 | GRMZM2G087787_T01         | ZmNF-X1-1  |
|    |                             |     |   | GRMZM2G139369_T01         | ZmNF-X1-2  |
|    |                             |     |   | GRMZM2G307823_T01         | ZmNF-X1-3  |
|    |                             |     |   | GRMZM2G409627_T01         | ZmNF-X1-4  |
| 52 | <i>Zostera marina</i>       | Zma | 2 | Zosma28g00280.1           | ZmaNF-X1-1 |
|    |                             |     |   | Zosma32g00890.1           | ZmaNF-X1-2 |

**Table S3. Amino acid conserved domain**

| Gene ID           | Accession | From | To  | Short name          |
|-------------------|-----------|------|-----|---------------------|
| Q#1 - >AtNF-X1-1  | cd16696   | 222  | 279 | RING-CH-C4HC3_NFX1  |
| Q#1 - >AtNF-X1-1  | cd06008   | 503  | 550 | NF-X1-zinc-finger   |
| Q#1 - >AtNF-X1-1  | cd06008   | 380  | 428 | NF-X1-zinc-finger   |
| Q#1 - >AtNF-X1-1  | cd06008   | 601  | 653 | NF-X1-zinc-finger   |
| Q#1 - >AtNF-X1-1  | cd06008   | 448  | 489 | NF-X1-zinc-finger   |
| Q#1 - >AtNF-X1-1  | cd06008   | 658  | 705 | NF-X1-zinc-finger   |
| Q#1 - >AtNF-X1-1  | cd06008   | 312  | 373 | NF-X1-zinc-finger   |
| Q#1 - >AtNF-X1-1  | cd06008   | 562  | 622 | NF-X1-zinc-finger   |
| Q#1 - >AtNF-X1-1  | cl00297   | 888  | 963 | R3H                 |
| Q#1 - >AtNF-X1-1  | cd06008   | 749  | 798 | NF-X1-zinc-finger   |
| Q#1 - >AtNF-X1-1  | pfam12273 | 58   | 134 | RCR                 |
| Q#1 - >AtNF-X1-1  | cl35953   | 86   | 215 | rne                 |
| Q#1 - >AtNF-X1-1  | cl10082   | 711  | 766 | NF-X1-zinc-finger   |
| Q#2 - >AtNF-X1-2  | cd16697   | 82   | 149 | RING-CH-C4HC3_NFXL1 |
| Q#2 - >AtNF-X1-2  | cd06008   | 424  | 472 | NF-X1-zinc-finger   |
| Q#2 - >AtNF-X1-2  | cd06008   | 344  | 393 | NF-X1-zinc-finger   |
| Q#2 - >AtNF-X1-2  | cd06008   | 237  | 285 | NF-X1-zinc-finger   |
| Q#2 - >AtNF-X1-2  | cd06008   | 290  | 330 | NF-X1-zinc-finger   |
| Q#2 - >AtNF-X1-2  | cd06008   | 397  | 445 | NF-X1-zinc-finger   |
| Q#2 - >AtNF-X1-2  | cd06008   | 183  | 231 | NF-X1-zinc-finger   |
| Q#2 - >AtNF-X1-2  | cl10082   | 631  | 672 | NF-X1-zinc-finger   |
| Q#3 - >OsNF-X1-1  | cl17238   | 109  | 160 | RING_Ubox           |
| Q#3 - >OsNF-X1-1  | cd06008   | 439  | 487 | NF-X1-zinc-finger   |
| Q#3 - >OsNF-X1-1  | cd06008   | 412  | 460 | NF-X1-zinc-finger   |
| Q#3 - >OsNF-X1-1  | cd06008   | 359  | 408 | NF-X1-zinc-finger   |
| Q#3 - >OsNF-X1-1  | cd06008   | 252  | 300 | NF-X1-zinc-finger   |
| Q#3 - >OsNF-X1-1  | cd06008   | 305  | 345 | NF-X1-zinc-finger   |
| Q#3 - >OsNF-X1-1  | cl10082   | 659  | 700 | NF-X1-zinc-finger   |
| Q#3 - >OsNF-X1-1  | cl10082   | 723  | 774 | NF-X1-zinc-finger   |
| Q#4 - >OsNF-X1-2  | cd16696   | 1    | 54  | RING-CH-C4HC3_NFX1  |
| Q#4 - >OsNF-X1-2  | cd06008   | 279  | 327 | NF-X1-zinc-finger   |
| Q#4 - >OsNF-X1-2  | cd06008   | 157  | 205 | NF-X1-zinc-finger   |
| Q#4 - >OsNF-X1-2  | cd06008   | 374  | 426 | NF-X1-zinc-finger   |
| Q#4 - >OsNF-X1-2  | cd06008   | 221  | 264 | NF-X1-zinc-finger   |
| Q#4 - >OsNF-X1-2  | cl10082   | 431  | 479 | NF-X1-zinc-finger   |
| Q#4 - >OsNF-X1-2  | cl10082   | 87   | 150 | NF-X1-zinc-finger   |
| Q#4 - >OsNF-X1-2  | cl10082   | 484  | 510 | NF-X1-zinc-finger   |
| Q#5 - >PtrNF-X1-1 | cd06008   | 228  | 272 | NF-X1-zinc-finger   |

|                   |         |     |     |                    |
|-------------------|---------|-----|-----|--------------------|
| Q#6 - >PtrNF-X1-2 | cl17238 | 90  | 157 | RING_Ubox          |
| Q#6 - >PtrNF-X1-2 | cd06008 | 431 | 479 | NF-X1-zinc-finger  |
| Q#6 - >PtrNF-X1-2 | cd06008 | 351 | 400 | NF-X1-zinc-finger  |
| Q#6 - >PtrNF-X1-2 | cd06008 | 404 | 452 | NF-X1-zinc-finger  |
| Q#6 - >PtrNF-X1-2 | cd06008 | 244 | 284 | NF-X1-zinc-finger  |
| Q#6 - >PtrNF-X1-2 | cd06008 | 299 | 340 | NF-X1-zinc-finger  |
| Q#6 - >PtrNF-X1-2 | cd06008 | 190 | 238 | NF-X1-zinc-finger  |
| Q#6 - >PtrNF-X1-2 | cd06008 | 641 | 682 | NF-X1-zinc-finger  |
| Q#6 - >PtrNF-X1-2 | cl10082 | 705 | 756 | NF-X1-zinc-finger  |
| Q#7 - >PtrNF-X1-3 | cd16696 | 122 | 179 | RING-CH-C4HC3_NFX1 |
| Q#7 - >PtrNF-X1-3 | cd06008 | 402 | 450 | NF-X1-zinc-finger  |
| Q#7 - >PtrNF-X1-3 | cd06008 | 280 | 328 | NF-X1-zinc-finger  |
| Q#7 - >PtrNF-X1-3 | cd06008 | 344 | 387 | NF-X1-zinc-finger  |
| Q#7 - >PtrNF-X1-3 | cd06008 | 498 | 541 | NF-X1-zinc-finger  |
| Q#7 - >PtrNF-X1-3 | cl00297 | 781 | 854 | R3H                |
| Q#7 - >PtrNF-X1-3 | cd06008 | 646 | 695 | NF-X1-zinc-finger  |
| Q#7 - >PtrNF-X1-3 | cd06008 | 555 | 603 | NF-X1-zinc-finger  |
| Q#7 - >PtrNF-X1-3 | cd06008 | 212 | 273 | NF-X1-zinc-finger  |
| Q#7 - >PtrNF-X1-3 | cl10082 | 460 | 519 | NF-X1-zinc-finger  |
| Q#7 - >PtrNF-X1-3 | cl10082 | 608 | 663 | NF-X1-zinc-finger  |
| Q#8 - >PtrNF-X1-4 | cd16696 | 122 | 179 | RING-CH-C4HC3_NFX1 |
| Q#8 - >PtrNF-X1-4 | cd06008 | 402 | 450 | NF-X1-zinc-finger  |
| Q#8 - >PtrNF-X1-4 | cd06008 | 280 | 328 | NF-X1-zinc-finger  |
| Q#8 - >PtrNF-X1-4 | cd06008 | 344 | 387 | NF-X1-zinc-finger  |
| Q#8 - >PtrNF-X1-4 | cl00297 | 750 | 823 | R3H                |
| Q#8 - >PtrNF-X1-4 | cd06008 | 212 | 273 | NF-X1-zinc-finger  |
| Q#8 - >PtrNF-X1-4 | cd06008 | 615 | 664 | NF-X1-zinc-finger  |
| Q#8 - >PtrNF-X1-4 | cd06008 | 524 | 572 | NF-X1-zinc-finger  |
| Q#8 - >PtrNF-X1-4 | cl17169 | 858 | 915 | RRM_SF             |

---

**Table S4. Amino acid sequence encode and SeqLogo of the Motif**

| Motif ID | Amino acid sequence encode                          | SeqLogo |
|----------|-----------------------------------------------------|---------|
| Motif_1  | FDALVDMDPRLVVSFLDLPREADISSLVLRFGGECELVWLNDKNALAVFN  |         |
| Motif_2  | VLADAFDITPPNLEALHFGENSAVTELGDLYRRDPKWVLAVEERCKYLV   |         |
| Motif_3  | MICYDMVRRSAPVWSCSSCF SIFHLNCIK                      |         |
| Motif_4  | RGTTSGLKIHFVFCPMLKDKRDAVRLIAERWKVAIYSAGWEPKRFIVIHAT |         |
| Motif_5  | CHFGDCPPCSVPVAKECVGGHVILGNIPCGSRDIRCNKLCGKTRQCGLHA  |         |
| Motif_6  | CPDVRCEFLVTISCSCGRMTASVPCDAGG                       |         |
| Motif_7  | WARAPTSVDLIAEKNQGFWRCPCGQSVQLTSLKDIRYVCF            |         |
| Motif_8  | FSCNNICKKSLDCGIHSCKQICHGDCPPCNARGVYKCSCG            |         |
| Motif_9  | QVLVNASCFCCKKTEVVLCGDMAVKGEVKAEDGVFSCNSTCGKMLGCGNH  |         |
| Motif_10 | GGYNDTILEASILHKLPAPLQPVESGKKIPLGQRKFMCDDECAKFERKR   |         |

**Table S5. Collinear genes among same species**

| <b>Ptr-Ptr</b>                         |
|----------------------------------------|
| <i>PtrNF-X1-1</i> —— <i>PtrNF-X1-2</i> |
| <i>PtrNF-X1-3</i> —— <i>PtrNF-X1-4</i> |

**Table S6. Collinear genes among different species**

| <b>Ptr-At</b>                                            | <b>Ptr-Os</b>                        |
|----------------------------------------------------------|--------------------------------------|
| <i>PtrNF-X1-1</i> , <i>PtrNF-X1-2</i> - <i>AtNF-X1-2</i> | <i>PtrNF-X1-1</i> - <i>OsNF-X1-1</i> |

**Table S7. Information of functional elements in *NF-X1* genes**

| <b>GeneID</b> | <b>Element</b> | <b>Sequence</b> | <b>Description</b>             |
|---------------|----------------|-----------------|--------------------------------|
| PtrNF-X1-1    | MBS            | CAACTG          | Drought inducibility           |
|               | MBS            | CAACTG          | Drought inducibility           |
|               | P-box          | CCTTTTG         | Gibberellin responsiveness     |
|               | CAT-box        | GCCACT          | Meristem expression            |
|               | CAT-box        | GCCACT          | Meristem expression            |
|               | TGACG-motif    | TGACG           | MeJA responsiveness            |
|               | CGTCA-motif    | CGTCA           | MeJA responsiveness            |
|               | ABRE           | GACACGTACGT     | Absciscic acid responsiveness  |
|               | ABRE           | TACGTGTC        | Absciscic acid responsiveness  |
|               | ABRE           | ACGTG           | Absciscic acid responsiveness  |
|               | ARE            | AAACCA          | Anaerobic induction            |
|               | ARE            | AAACCA          | Anaerobic induction            |
|               | TCA-element    | TCAGAAGAGG      | Salicylic acid responsiveness  |
|               | TCA-element    | CCATCTTTTT      | Salicylic acid responsiveness  |
|               | GCN4_motif     | TGAGTCA         | Endosperm expression           |
|               | LTR            | CCGAAA          | Low temperature responsiveness |
|               | TCA-element    | TCAGAAGAGG      | Salicylic acid responsiveness  |
|               | TCA-element    | CCATCTTTTT      | Salicylic acid responsiveness  |
|               | ARE            | AAACCA          | Anaerobic induction            |
| PtrNF-X1-2    | ARE            | AAACCA          | Anaerobic induction            |
|               | ABRE           | ACGTG           | Absciscic acid responsiveness  |
|               | ABRE           | CACGTG          | Absciscic acid responsiveness  |
|               | ABRE           | ACGTG           | Absciscic acid responsiveness  |
|               | RY-element     | CATGCATG        | Seed specific regulation       |
|               | GC-motif       | CCCCCG          | Anoxic specific inducibility   |



|            |                 |            |                                   |
|------------|-----------------|------------|-----------------------------------|
| PtrNF-X1-3 | TGACG-motif     | TGACG      | MeJA responsiveness               |
|            | CAT-box         | GCCACT     | Meristem expression               |
|            | TC-rich repeats | GTTTTCTTAC | Defense and stress responsiveness |
|            | ARE             | AAACCA     | Anaerobic induction               |
|            | ABRE            | CGCACGTGTC | Absciscic acid responsiveness     |
|            | ABRE            | CACGTG     | Absciscic acid responsiveness     |
|            | ABRE            | ACGTG      | Absciscic acid responsiveness     |
|            | CGTCA-motif     | CGTCA      | MeJA responsiveness               |
|            | TGA-element     | AACGAC     | Auxin responsive                  |
|            | TC-rich repeats | GTTTTCTTAC | Defense and stress responsiveness |
| PtrNF-X1-4 | TC-rich repeats | GTTTTCTTAC | Defense and stress responsiveness |
|            | TC-rich repeats | ATTCTCTAAC | Defense and stress responsiveness |
|            | TC-rich repeats | ATTCTCTAAC | Defense and stress responsiveness |
|            | TC-rich repeats | ATTCTCTAAC | Defense and stress responsiveness |
|            | LTR             | CCGAAA     | Low temperature responsiveness    |
|            | TGA-element     | AACGAC     | Auxin responsive                  |
|            | RY-element      | CATGCATG   | Seed specific regulation          |
|            | ARE             | AAACCA     | Anaerobic induction               |
|            | ARE             | AAACCA     | Anaerobic induction               |
|            | ARE             | AAACCA     | Anaerobic induction               |
|            | TCA-element     | CCATCTTTTT | Salicylic acid responsiveness     |
|            | ABRE            | CACGTG     | Absciscic acid responsiveness     |
|            | ABRE            | ACGTG      | Absciscic acid responsiveness     |

---

Table S8. The number of functional elements in *NF-X1* genes

| Gene ID           | MeJA-responsiveness | salicylic acid<br>responsiveness | abscisic acid<br>responsiveness | drought-inducibility | defense and stress<br>responsiveness | low-temperature<br>responsiveness | anoxic specific<br>inducibility | anaerobic induction | Meristem expression | gibberellin<br>responsiveness | auxin-responsive | seed-specific<br>regulation | endosperm expression |
|-------------------|---------------------|----------------------------------|---------------------------------|----------------------|--------------------------------------|-----------------------------------|---------------------------------|---------------------|---------------------|-------------------------------|------------------|-----------------------------|----------------------|
| <i>PtrNF-X1-1</i> | 2                   | 2                                | 3                               | 2                    | /                                    | /                                 | /                               | 2                   | 2                   | 1                             | /                | /                           | 1                    |
| <i>PtrNF-X1-2</i> | /                   | 2                                | 3                               | /                    | /                                    | 1                                 | 1                               | 2                   | /                   | /                             | /                | 1                           | /                    |
| <i>PtrNF-X1-3</i> | 2                   | /                                | 3                               | /                    | 1                                    | /                                 | /                               | 1                   | 1                   | /                             | 1                | /                           | /                    |
| <i>PtrNF-X1-4</i> | /                   | 1                                | 2                               | /                    | 4                                    | 1                                 | /                               | 3                   | /                   | /                             | 1                | 1                           | /                    |



**Table S9. Expression of *NF-X1* genes in different plant tissues**

| Gene ID           | Twigs-<br>Non-<br>Girdle<br>d | Flowers<br>-<br>Dormant<br>t | Flowers-<br>Expand<br>d | Leaves<br>-<br>Mature<br>e | Leaves<br>-<br>Mature<br>e 2 | Flowers-<br>Expandin<br>g | Suckers<br>-<br>Whole-<br>Sucker | Petiole<br>-<br>Mature<br>e | Buds-<br>Prechillin<br>g | Buds-<br>Dormant<br>t | Leaves-<br>Freshly-<br>Expand<br>d | Leaves<br>-Non-<br>Girdle<br>d | Leaves<br>-<br>Girdle<br>d | Seeds-<br>Mature<br>e | Leaves-<br>Young-<br>Expandin<br>g | Cambium-<br>Phloem-<br>Dormant |
|-------------------|-------------------------------|------------------------------|-------------------------|----------------------------|------------------------------|---------------------------|----------------------------------|-----------------------------|--------------------------|-----------------------|------------------------------------|--------------------------------|----------------------------|-----------------------|------------------------------------|--------------------------------|
| <i>PtrNF-X1-1</i> | 0.734                         | -0.072                       | -0.890                  | -0.135                     | -0.438                       | 0.466                     | 0.465                            | 0.414                       | 0.812                    | 0.496                 | -0.322                             | -1.783                         | -0.368                     | -0.448                | 0.322                              | 0.104                          |
| <i>PtrNF-X1-2</i> | -0.079                        | 0.230                        | 0.141                   | -0.199                     | -0.062                       | -0.078                    | -0.102                           | -0.054                      | 0.111                    | 0.425                 | 0.027                              | 0.549                          | -0.126                     | 0.014                 | -0.078                             | 0.163                          |
| <i>PtrNF-X1-3</i> | -0.355                        | -0.638                       | 0.079                   | 0.669                      | 0.645                        | -0.268                    | -0.070                           | 0.185                       | -0.450                   | -0.511                | -0.190                             | 1.037                          | 0.507                      | -0.215                | -0.529                             | -0.583                         |
| <i>PtrNF-X1-4</i> | 0.111                         | 0.102                        | 0.238                   | -0.082                     | -0.106                       | 0.019                     | -0.182                           | -0.345                      | 0.108                    | 0.310                 | -0.181                             | -0.014                         | 0.377                      | 0.249                 | 0.011                              | 1.294                          |

**Table S10. Expression of *NF-X1* genes in different treatments**

| <b>GeneID</b>     | <b>Leaves-Beetle-Damaged</b> | <b>Leaves-Mechanical-Damage</b> | <b>Leaves-Drought</b> | <b>Roots-Drought</b> |
|-------------------|------------------------------|---------------------------------|-----------------------|----------------------|
| <i>PtrNF-X1-1</i> | -0.720                       | -0.364                          | -0.606                | 1.590                |
| <i>PtrNF-X1-2</i> | 0.451                        | 0.288                           | 1.285                 | 0.403                |
| <i>PtrNF-X1-3</i> | 0.489                        | -0.003                          | -0.319                | -0.601               |
| <i>PtrNF-X1-4</i> | -0.165                       | 0.055                           | -0.244                | 0.323                |
